# Supplementary figures and images for: Breaking bad news: what parents would like you to know
Source: HighWire-hosted journal article supplement (doi:10.1136/archdischild-2019-318398), 2020-10-30

Coding Scheme Bad News Communication

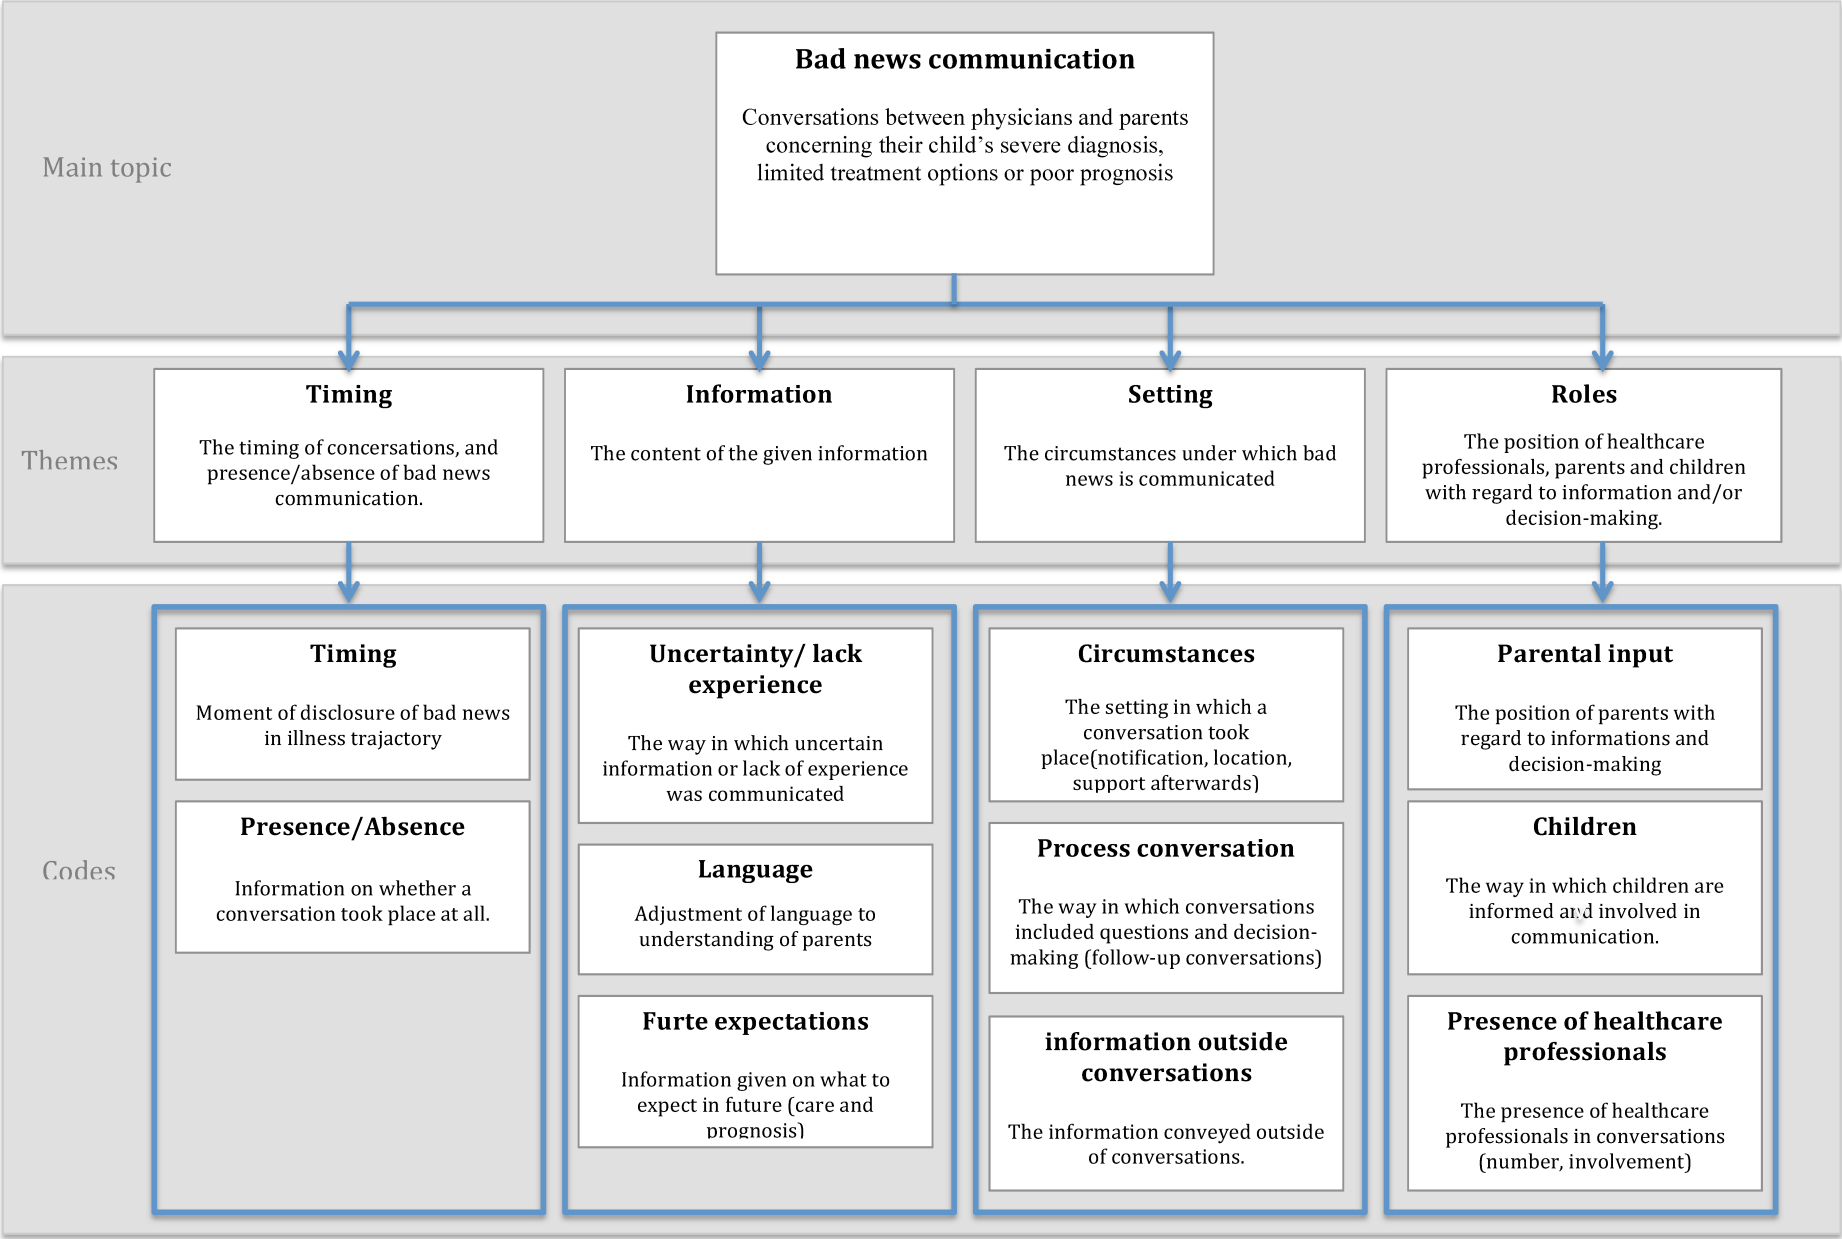

Supplement: archdischild-2019-318398supp002_data_supplement.pdf [file archdischild-2019-318398supp002_data_supplement.pdf]
